# Supplementary material for: Mapping the global research landscape of sap flow studies in forest ecosystems: a bibliometric analysis (2000–2024)
Source: Research Square preprint supplement (doi:10.21203/rs.3.rs-8739987/v1), 2026-02-23
Supplement: Supplementary file 1 [file a0a256508bee9224187c9fe5.docx]

**Supplementary figures with caption**

**
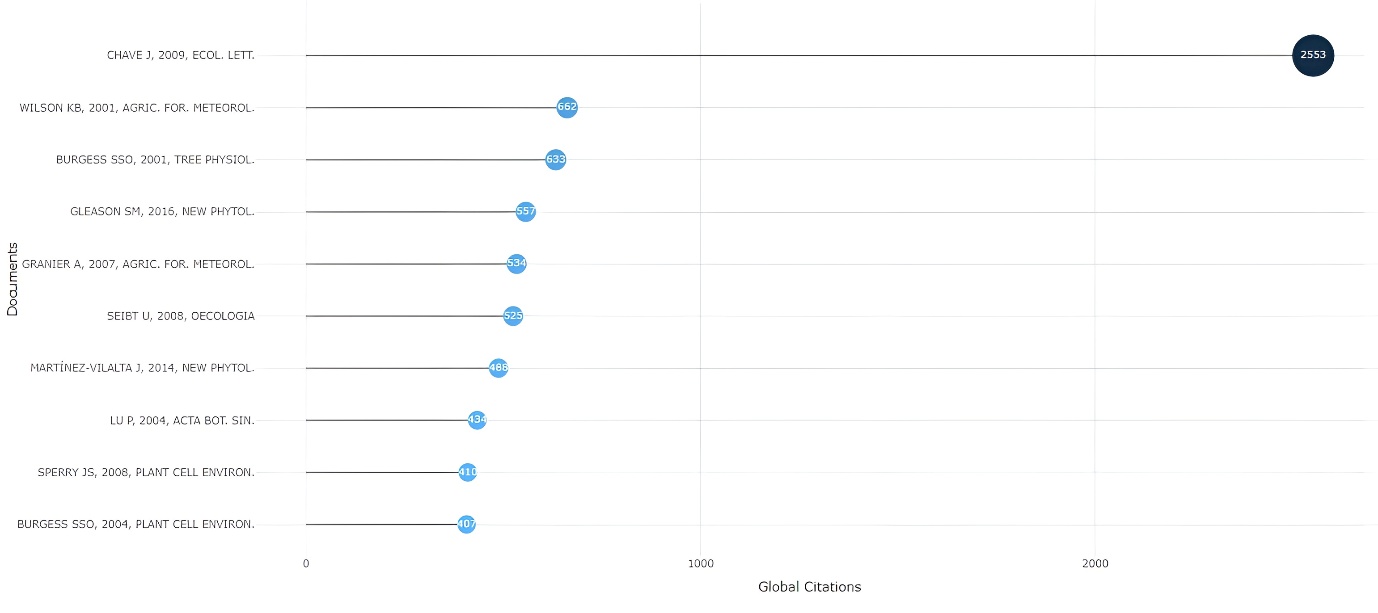
**

**Supplementary Figure 1.** Most globally cited documents in sap flow research based on total citation counts in the Scopus database (2000–2024)


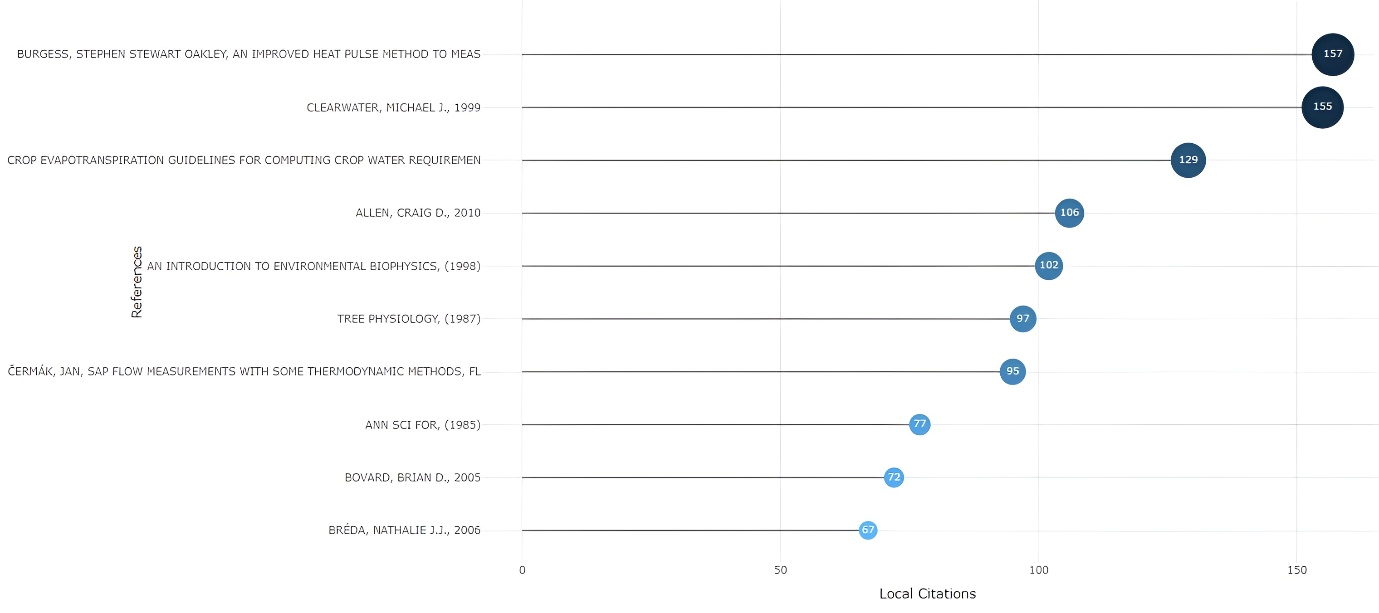


**Supplementary Figure 2.** Most locally cited documents in sap flow research, based on citation counts within the analysed dataset.

**
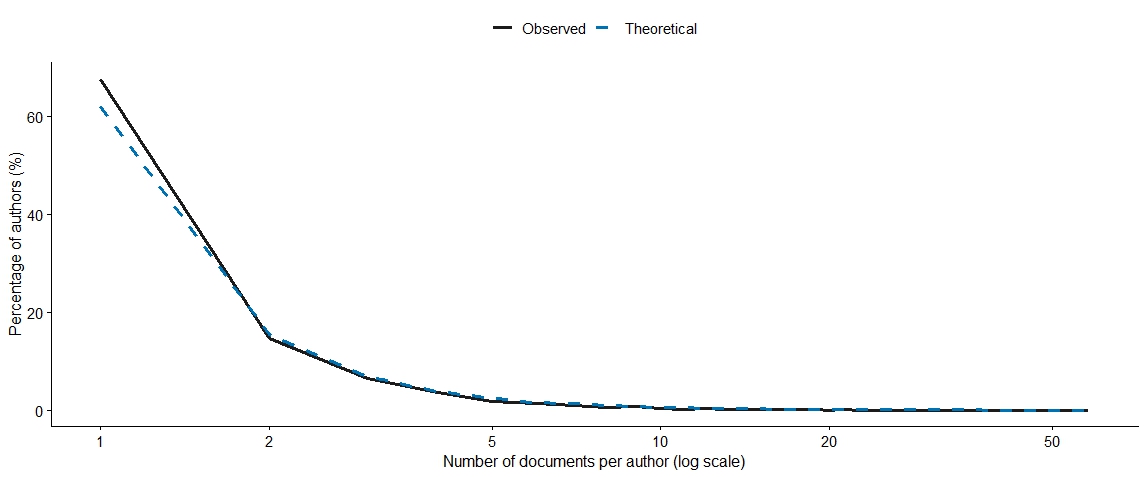
**

**Supplementary Figure 3.** Lotka’s law distribution of author productivity in sap flow research (2000–2024). The solid line represents the observed percentage of authors contributing a given number of publications, while the dashed line shows the theoretical distribution predicted by Lotka’s inverse square law.

**
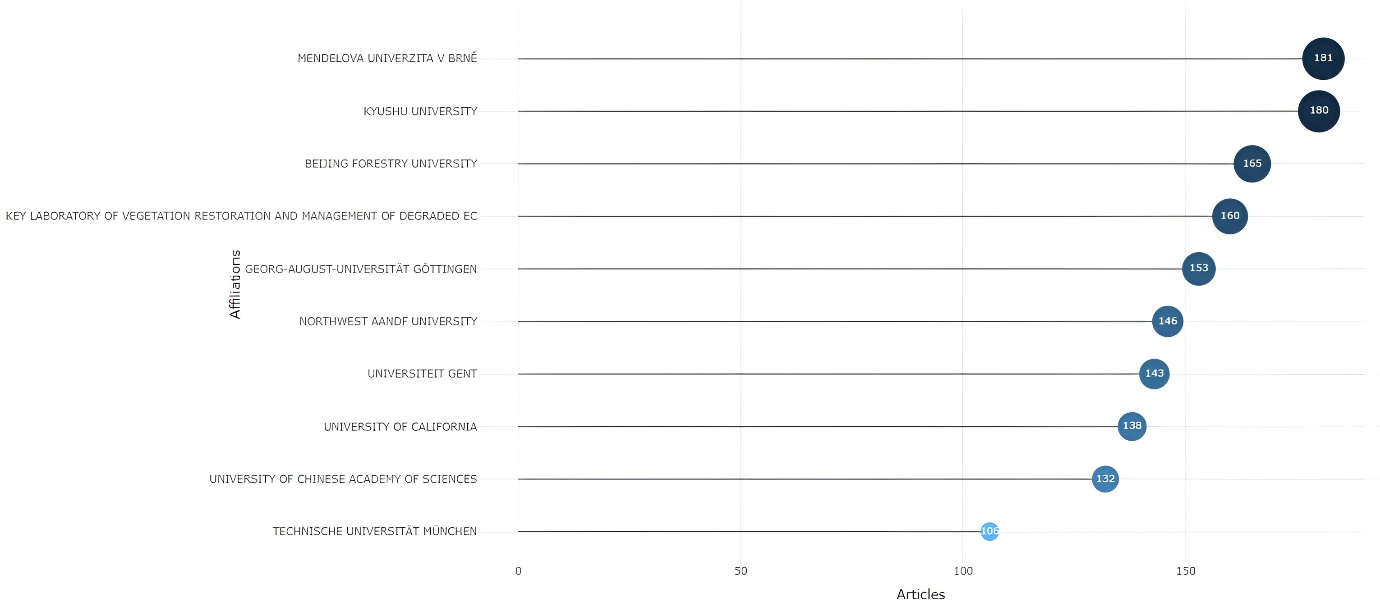
**

**Supplementary Figure 4.** Most relevant institutional affiliations in sap flow research based on the number of publications indexed in the Scopus database (2000–2024).


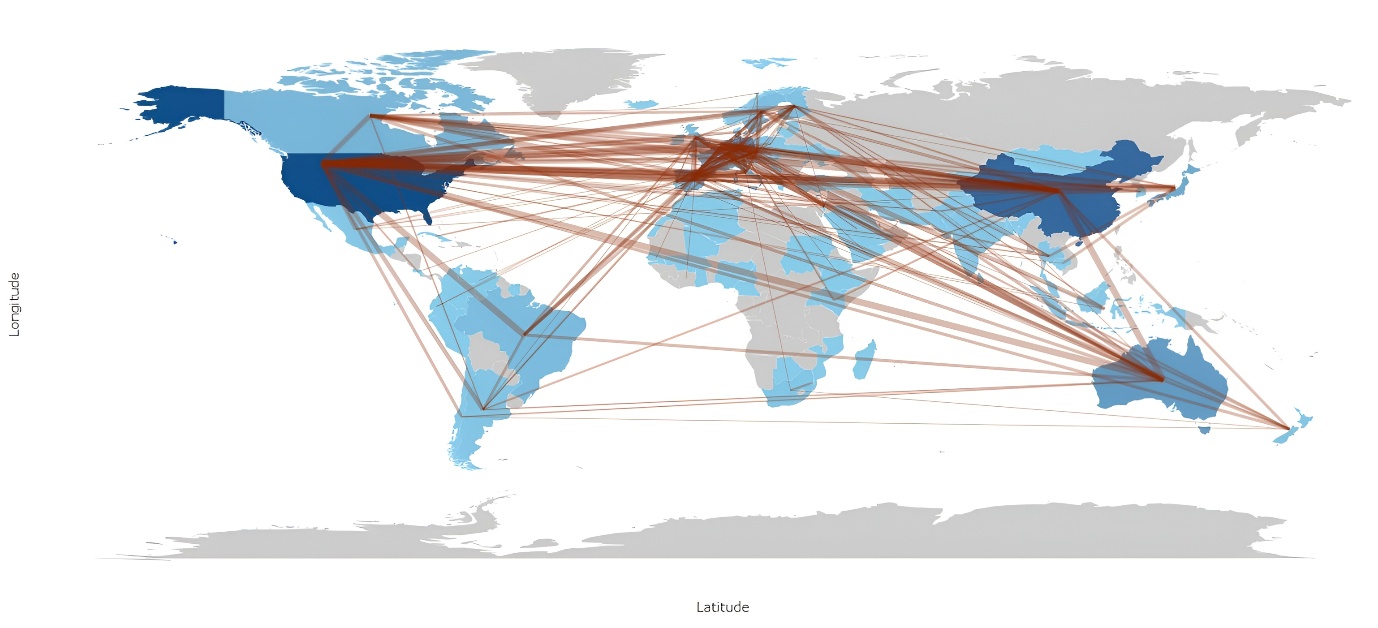


**Supplementary Figure 5.** International collaboration network among countries engaged in sap flow research. Nodes represent countries and link thickness indicates the strength of co-authorship ties, illustrating major collaborative linkages across regions.


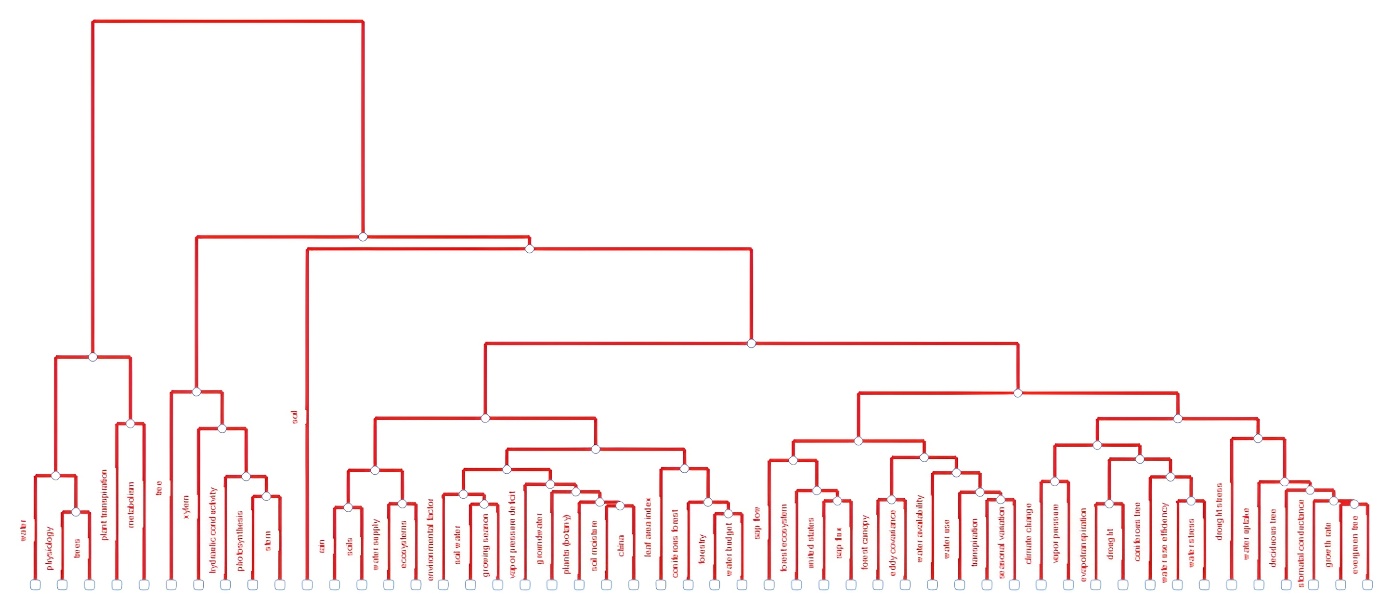


**Supplementary Figure 6.** Hierarchical dendrogram derived from multiple correspondence analysis showing the clustering of keywords in sap flow research based on their conceptual similarity.


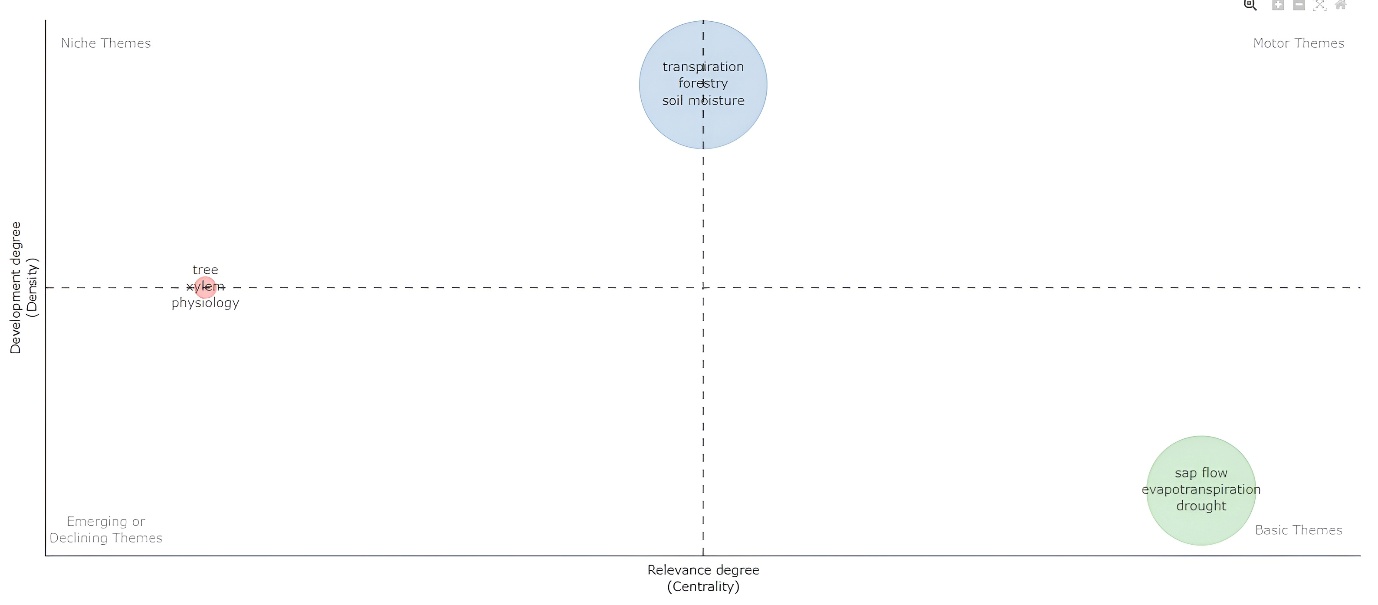


**Supplementary Figure 7.** Thematic map illustrating the conceptual structure of sap flow research based on keyword co-occurrence analysis. Themes are positioned according to their centrality (relevance) and density (development), distinguishing motor themes, basic themes, niche themes, and emerging or declining themes within the literature.


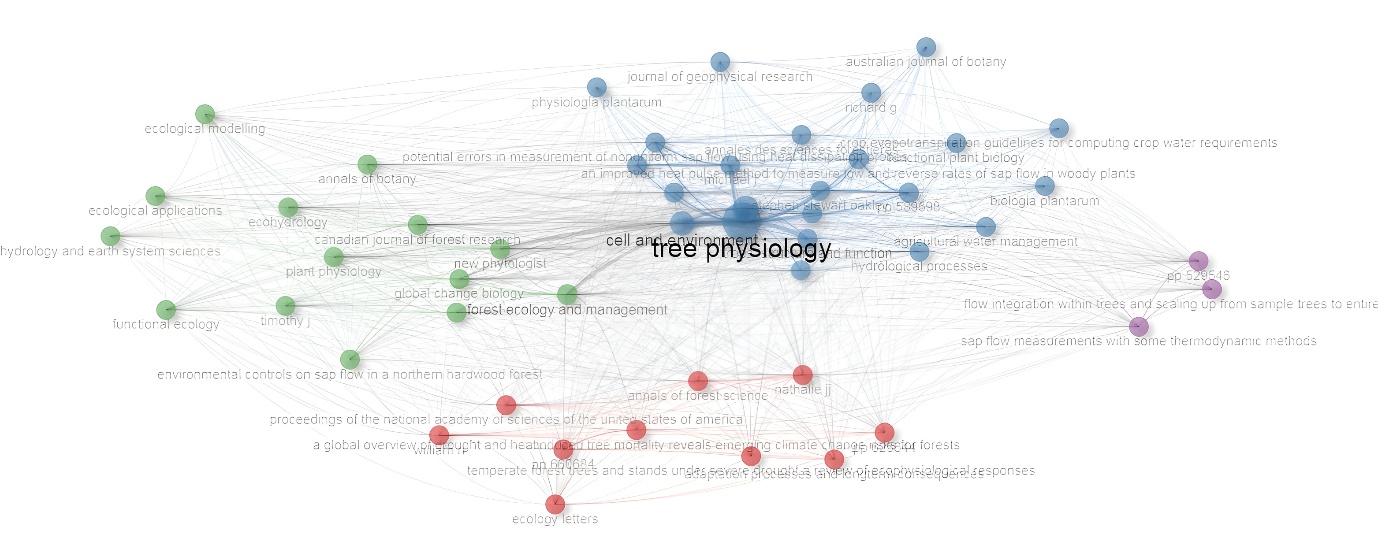


**Supplementary Figure 8.** Source co-citation network of journals publishing sap flow research based on cited references within the Scopus dataset (2000–2024). Nodes represent journals, node size reflects co-citation frequency, and links indicate co-citation relationships, with colours denoting major source clusters within the literature.


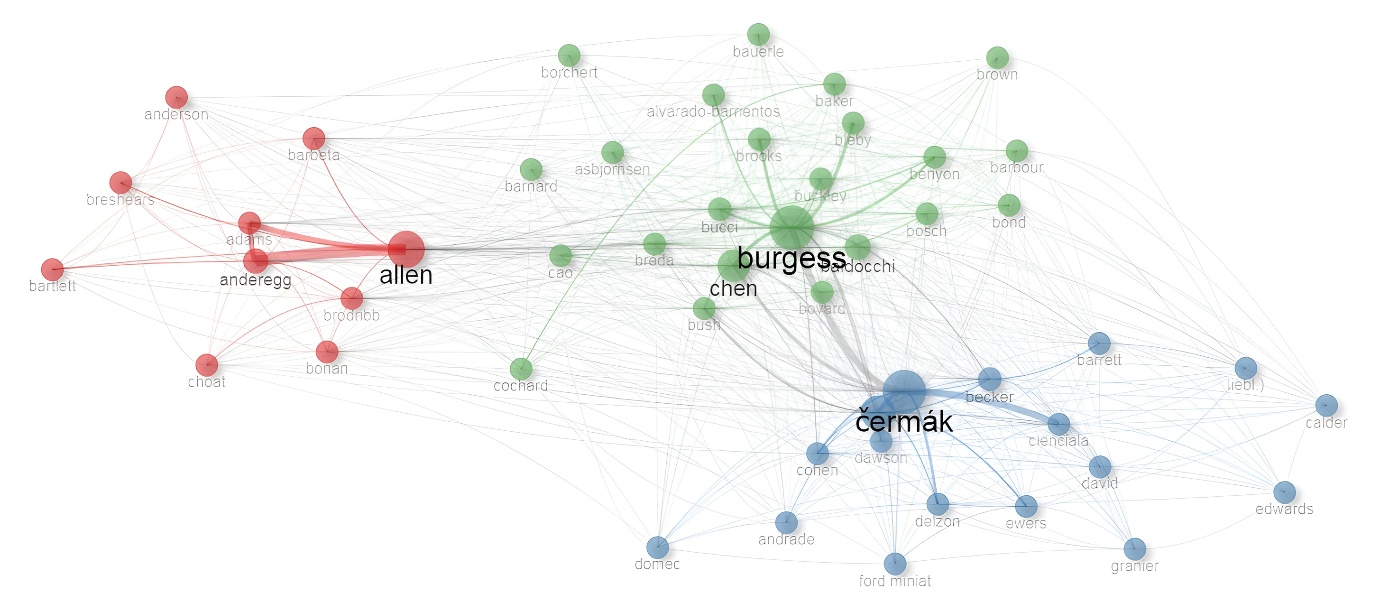


**Supplementary Figure 9.** Author co-citation network in sap flow research based on cited references within the Scopus dataset (2000–2024). Nodes represent authors, node size reflects co-citation frequency, and links indicate co-citation relationships. Colours denote major co-citation clusters, highlighting key intellectual groupings within the field.
